# Supplementary material
Source: PubMed Central journal article supplement (PMC2515142)
Supplement: blood-2008-03-147033_1.pdf [file blood-2008-03-147033_1.pdf]

---

|                      |                                                                                 |
|----------------------|---------------------------------------------------------------------------------|
| mouse IL-6           | sense 5'-GAGAGGAGACTTCACAGAGGATAC-3'<br>antisense 5'-GTACTCCAGAAGACCAGAGG-3'    |
| mouse TNF- $\alpha$  | sense 5'-GACACCATGAGCACAGAAAG-3'<br>antisense 5'-GAGTAGACAAGGTACAACCC-3'        |
| mouse VEGF           | sense 5'-CTTTCTGCTCTCTTGGGTGC-3'<br>antisense 5'-CATGGTGATGTTGCTCTCTG-3'        |
| mouse CCL2           | sense 5'-CACCTGCTGCTACTCATTAC-3'<br>antisense 5'-CACTGTCACACTGGTCACTCCTAC-3'    |
| mouse iNOS           | sense 5'-GAGATTGGAGTTCGAGACTTCTGTG-3'<br>antisense 5'-TGGCTAGTGCTTCAGACTTC-3'   |
| mouse Cox-2          | sense 5'-C TTCTCCAACCTCTCCTACT-3'<br>antisense 5'-CACCAG ACCAAAGACTTCCTG-3'     |
| mouse IL-2           | sense 5'-CTCCACTTCAAGCTCTACAG-3'<br>antisense 5'-GAGTCAAATCCAGAACATGCC-3'       |
| mouse IL-10          | sense 5'-CTCTTACTGACTGGCATGAGG -3'<br>antisense 5'-CCTTGTAGACACCTTGGTCTTGGAG-3' |
| mouse Foxp3          | sense 5'-CAAGCAGATCATCTCCTGGATGAG-3'<br>antisense 5'-GAACATGCGAGTAAACCAATGG-3'; |
| mouse TGF- $\beta$ 1 | sense 5'-GTGGTATACTGAGACACCTTGG-3'<br>antisense 5'-CCTTAGTTTGGACAGGATCTGG-3'    |
| mouse IL-17          | sense 5'-CTGTGTCTCTGATGCTGTTG-3'<br>antisense 5'- ACGCTGAGCTTTGAGGGATG-3'       |

---
