# Supplementary material
Source: PubMed Central journal article supplement (PMC2515142)
Supplement: blood-2008-03-147033_2.pdf [file blood-2008-03-147033_2.pdf]

---

|             |           |                                 |
|-------------|-----------|---------------------------------|
| mouse SCF   | sense     | 5'-GCTTGACTACTCTTCTGGAC-3'      |
|             | antisense | 5'-CTCTCTCTTTCTGTTGCAAC-3'      |
| mouse MMP-9 | sense     | 5'-CAGATGATGGGAGAGAAGCAG-3'     |
|             | antisense | 5'-GAAGGTGAAGGGAAAGTGAC-3'      |
| mouse GAPDH | sense     | 5'-GTGGAGATTGTTGCACAACG-3'      |
|             | antisense | 5'-CAGTGGATGCAGGGATGATGTTCTG-3' |
| human SCF   | sense     | 5'-GAGCTCCAGAACAGCTAAACG-3'     |
|             | antisense | 5'-CACTCCACAAGGTCATCCAC-3'      |
| mouse GAPDH | sense     | 5'-TGATGACATCAAGAAGGTGGTGAAG-3' |
|             | antisense | 5'-TCCTTGGAGGCCATGTGGGCCAT-3'   |

---
